# Supplementary material
Source: PubMed Central journal article supplement (PMC7579976)

A

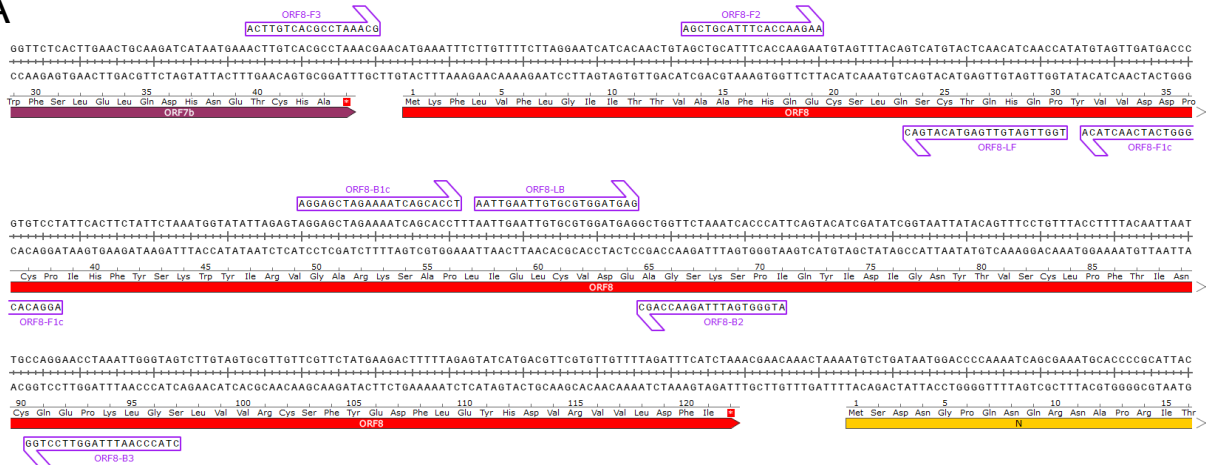

B

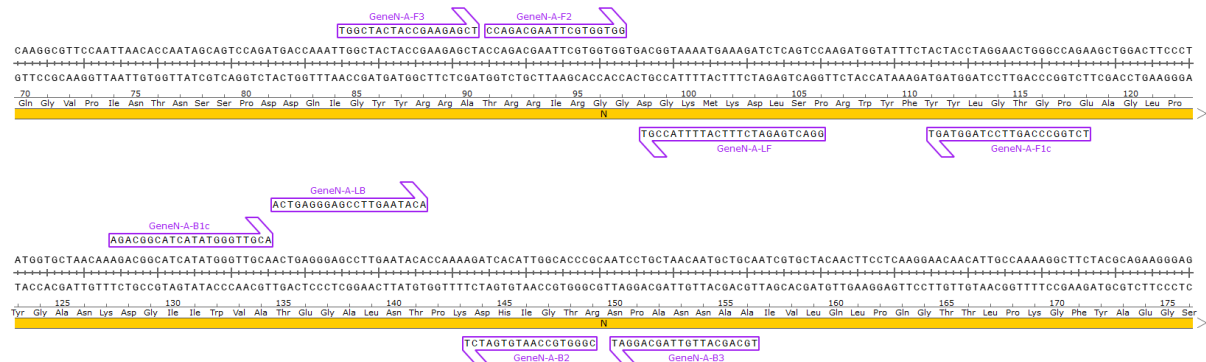

Supplement: 12985_2020_1435_MOESM1_ESM.pdf [file 12985_2020_1435_MOESM1_ESM.pdf]
