# Supplementary material
Source: PubMed Central journal article supplement (PMC7579976)

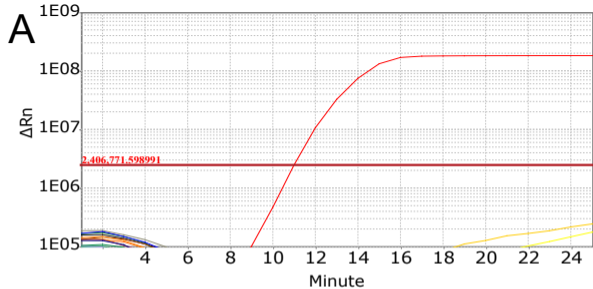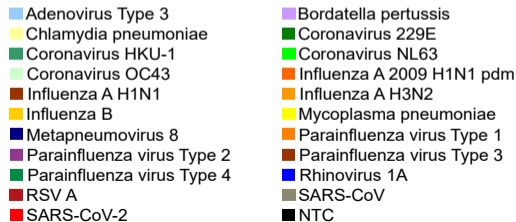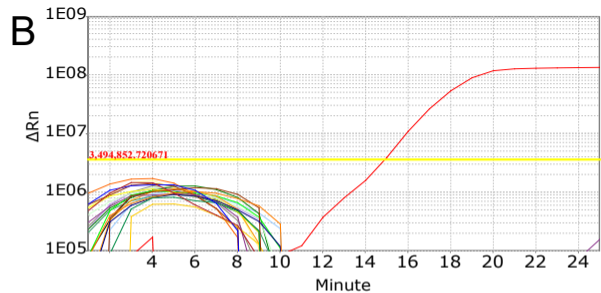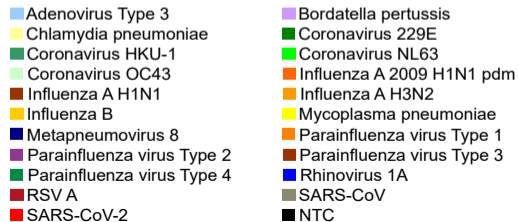

Supplement: 12985_2020_1435_MOESM4_ESM.pdf [file 12985_2020_1435_MOESM4_ESM.pdf]
